# Supplementary material for: Small molecule inhibitors and CRISPR/Cas9 mutagenesis demonstrate that SMYD2 and SMYD3 activity are dispensable for autonomous cancer cell proliferation
Source: PLOS journal article supplement (doi:10.1371/journal.pone.0197372), 2018-06-01

**Figure S9. Mechanism of inhibition of SMYD2 by EPZ032597.**  $IC_{50}$  values with their standard error from eq 4 are plotted as a function of peptide concentration. EPZ032597 inhibition is best described as noncompetitive versus peptide using eq 6 with a  $K_i$  value of  $21.5 \pm 1.5$  nM from one experiment.

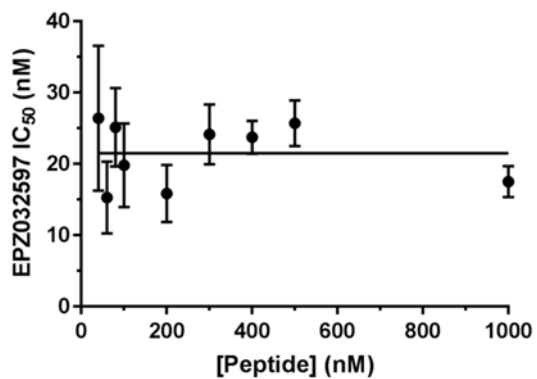

Supplement: S10 (10.1371/journal.pone.0197372.s010) [file journal.pone.0197372.s010]
